# Supplementary material for: Fusarium Mycotoxins in Two Hulless Oat and Barley Cultivars Used for Food Purposes
Source: Foods. 2020 Aug 1;9(8):1037. doi: 10.3390/foods9081037 (PMC7466365; doi:10.3390/foods9081037)
Supplement: Supplementary file 1 [file foods-09-01037-s001.xls]

## Sheet: S1
Table S1
Mycotoxin content in two cultivars of hulless barley grown at two locations (Kroměříž: KM, Zubří: ZB)
Harvest year	Location	Cultivar	DON	T2	HT2	NIV	BEA	ENA	ENA1	ENB	ENB1
			(μg/kg)
2015	KM	AF Cesar	<50	<5	25 ± 10	<80	<5	<5	11 ± 5	45 ± 15	31 ± 11
2015	KM	AF Lucius	50 ± 16	<5	12 ± 5	<80	<5	<5	9 ± 4	25 ± 10	20 ± 8
2016	KM	AF Cesar	66 ± 20	<5	23 ± 9	166 ± 41	6 ± 3	<5	16 ± 7	59 ± 18	45 ± 15
2016	KM	AF Lucius	<50	<5	21 ± 8	<80	6 ± 3	<5	27 ± 10	86 ± 25	70 ± 21
2017	KM	AF Cesar	<50	<5	12 ± 5	<80	<5	<5	<5	11 ± 5	10 ± 5
2017	KM	AF Lucius	<50	<5	14 ± 6	<80	<5	<5	<5	6 ± 3	<5
mean at KM			<50	<5	18 ± 6	<80	<5	<5	11 ± 9	39 ± 31	30 ± 25
2015	ZB	AF Cesar	<50	<5	<5	348 ± 72	28 ± 10	9 ± 4	67 ± 20	428 ± 85	214 ± 50
2015	ZB	AF Lucius	<50	<5	<5	727 ± 128	56 ± 18	11 ± 5	87 ± 25	499 ± 96	264 ± 59
2016	ZB	AF Cesar	<50	<5	<5	282 ± 62	423 ± 84	<5	50 ± 16	592 ± 109	198 ± 47
2016	ZB	AF Lucius	<50	<5	<5	334 ± 70	66 ± 20	13 ± 6	87 ± 25	581 ± 108	281 ± 61
2017	ZB	AF Cesar	<50	<5	<5	444 ± 87	50 ± 16	<5	29 ± 11	316 ± 67	113 ± 30
2017	ZB	AF Lucius	<50	<5	<5	369 ± 76	36 ± 13	<5	<5	61 ± 19	12 ± 5
mean at ZB			<50	<5	<5	417 ± 161	110 ± 154	7 ± 5	54 ± 33	413 ± 201	180 ± 101
DON: deoxynivalenol, T2: T-2 toxin; HT2: HT-2 toxin; NIV: nivalenol, BEA: beauvericin, ENA: enniatin A, ENA1: enniatin A1, ENB: enniatin B, ENB1: enniatin B1

## Sheet: S2
Table S2
Mycotoxin content in two cultivars of hulless oats grown at two locations (Kroměříž: KM, Zubří: ZB)
Harvest year	Location	Cultivar	DON	T2	HT2	NIV	BEA	ENA	ENA1	ENB	ENB1
			(μg/kg)
2015	KM	Otakar	<50	<5	28 ± 10	<80	<5	<5	<5	<5	<5
2015	KM	Saul	<50	7 ± 4	<5	<80	<5	<5	<5	<5	<5
2016	KM	Otakar	<50	11 ± 5	19 ± 8	<80	<5	<5	<5	<5	<5
2016	KM	Saul	<50	6 ± 3	21 ± 8	<80	<5	<5	<5	<5	<5
2017	KM	Otakar	<50	<5	12 ± 5	<80	<5	<5	<5	<5	<5
2017	KM	Saul	<50	<5	13 ± 6	<80	<5	<5	<5	<5	<5
mean at KM			<50	5 ± 3	16 ± 9	<80	<5	<5	<5	<5	<5
2015	ZB	Otakar	<50	<5	<5	<80	<5	<5	<5	8 ± 4	<5
2015	ZB	Saul	<50	<5	<5	<80	<5	<5	<5	8 ± 4	<5
2016	ZB	Otakar	<50	<5	<5	<80	27 ± 10	<5	<5	34 ± 12	11 ± 5
2016	ZB	Saul	<50	6 ± 3	16 ± 7	<80	29 ± 11	<5	<5	55 ± 17	15 ± 6
2017	ZB	Otakar	<50	<5	10 ± 5	304 ± 65	35 ± 12	<5	<5	<5	<5
2017	ZB	Saul	<50	<5	<5	115 ± 31	10 ± 5	<5	<5	<5	<5
mean at ZB			<50	<5	6 ± 6	96 ± 106	17 ± 14	<5	<5	18 ± 21	6 ± 5
DON: deoxynivalenol, T2: T-2 toxin; HT2: HT-2 toxin; NIV: nivalenol, BEA: beauvericin, ENA: enniatin A, ENA1: enniatin A1, ENB: enniatin B, ENB1: enniatin B1
